# Supplementary material for: Pancreatic Ductal Organoids React Kras Dependent to the Removal of Tumor Suppressive Roadblocks
Source: Hindawi journal article supplement (doi:10.1155/2019/2079742), 2019-05-19
Supplement: f1 [file 2079742.f1.pdf]

A

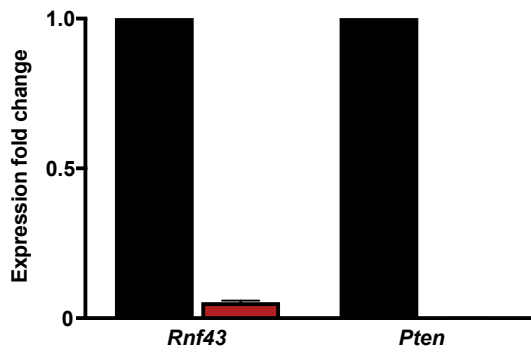

B

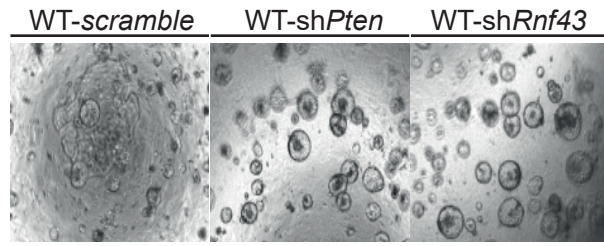

C

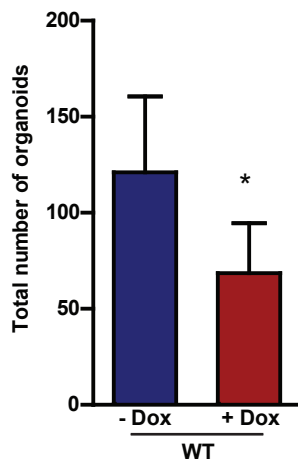

D

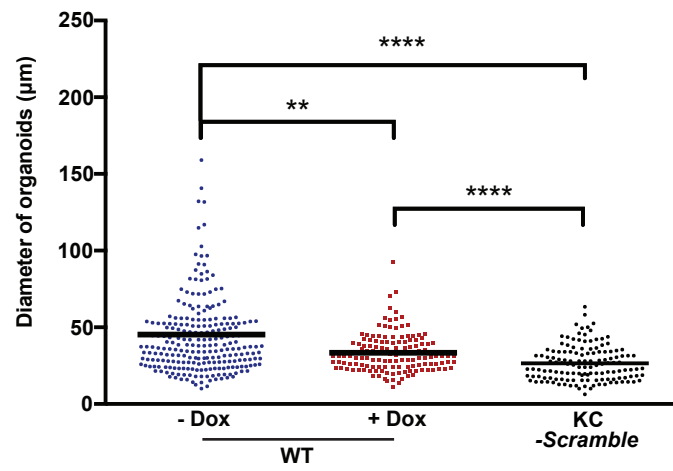

Supplementary Figure 1
